# Supplementary material for: Secondary Unconjugated Bile Acids Induce Hepatic Stellate Cell Activation
Source: PubMed Central journal article supplement (PMC6213941; doi:10.3390/ijms19103043), 2018-10-05
Supplement: ijms-19-03043-s001.pdf [file ijms-19-03043-s001.pdf]

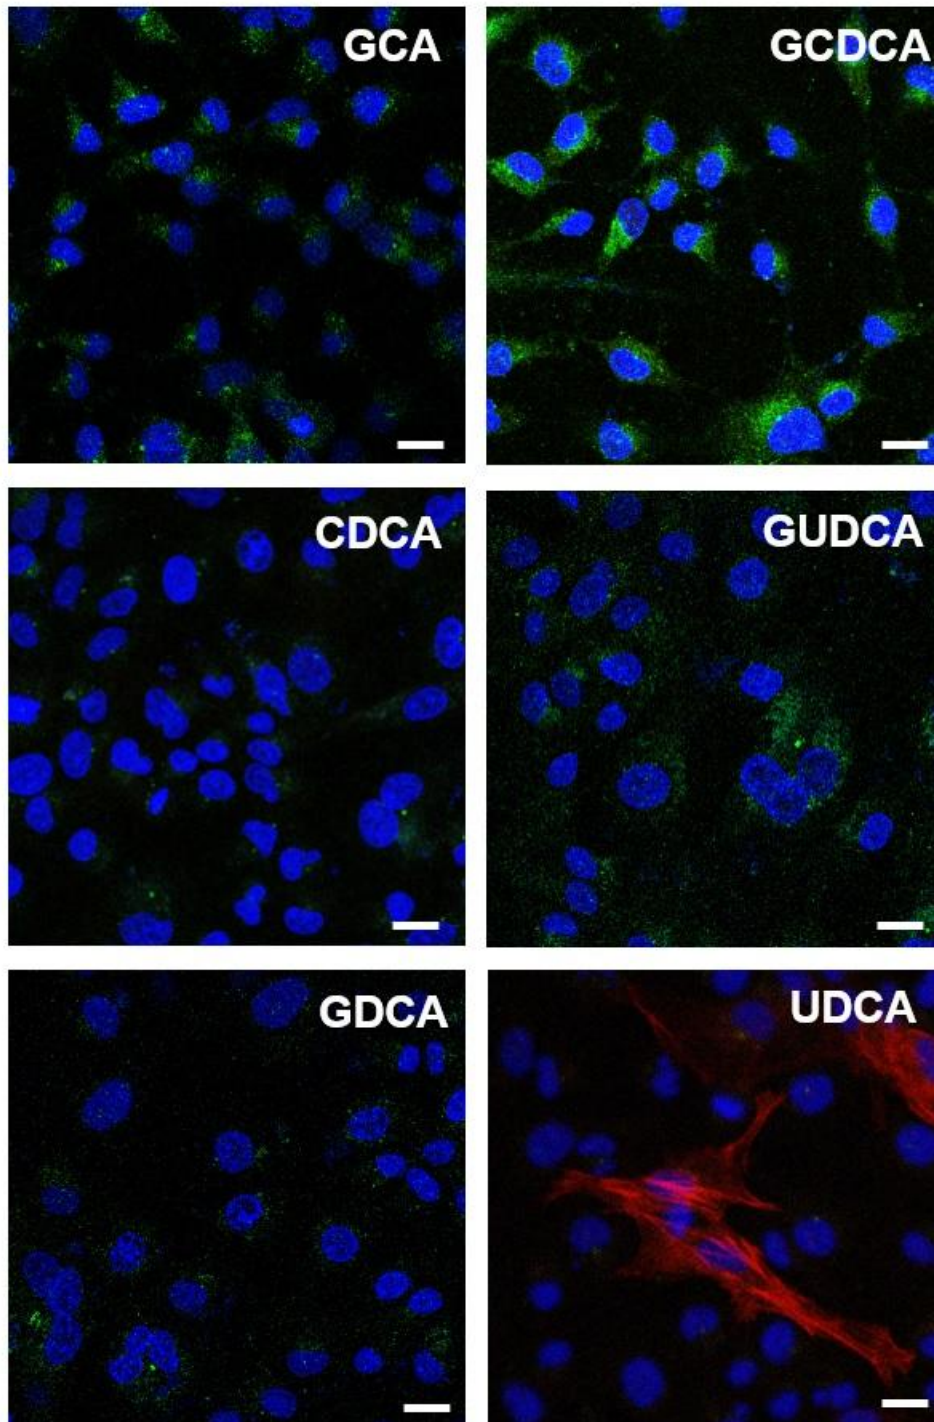

**Figure S1. Morphological changes in LX-2 cells exposed to bile acids.** LX-2 cells were treated with 500  $\mu$ M glycolic acid (GCA), glycochenodeoxycholic acid (GCDCA), chenodeoxycholic acid (CDCA), glyoursodeoxycholic acid (GUDCA), glycodeoxycholic acid (GDCA), or ursodeoxycholic acid (UDCA) for 48 h. Scale bars, 20  $\mu$ m.
